# Supplementary material for: Organ-specific adaptive signaling pathway activation in metastatic breast cancer cells
Source: Oncotarget. 2015 Mar 30;6(14):12682–96. doi: 10.18632/oncotarget.3707 (PMC4494966; doi:10.18632/oncotarget.3707)
Supplement: Supplementary file 1 [file oncotarget-06-12682-s001.pdf]

# Organ-specific adaptive signaling pathway activation in metastatic breast cancer cells

## Supplementary Material

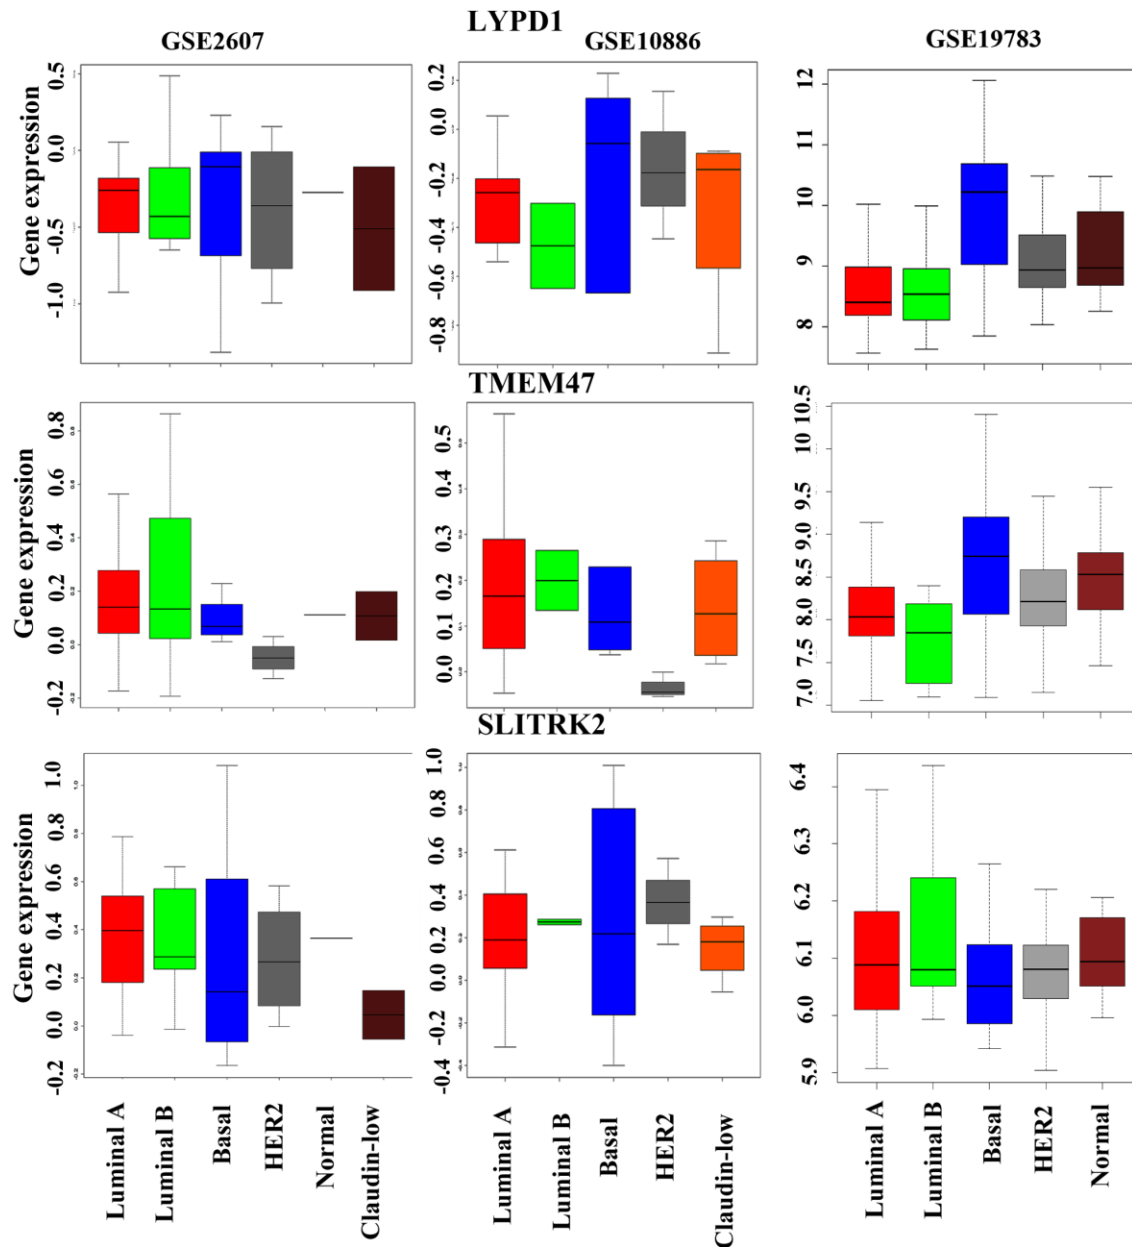

**Figure S1:** Expression levels of LYPD1, TMEM47, and SLITRK2 in various subtypes of breast cancer. Datasets used for the analyses are indicated. Normalized data were used for these analyses.

|         |           |           | GSE 2607 |              | GSE 10886 |              | GSE 19783 |              |
|---------|-----------|-----------|----------|--------------|-----------|--------------|-----------|--------------|
|         |           |           | PVAL     | RATIO        | PVAL      | RATIO        | PVAL      | RATIO        |
| TMEM47  | LUMINAL A | LUMINAL B | 0.5353   | 0.597437326  | 0.9189    | 0.952836637  | 0.0167    | 0.509908991  |
|         | LUMINAL A | BASAL     | 0.6043   | 1.38018018   | 0.5898    | 0.606673114  | 0.1478    | -0.419591212 |
|         | LUMINAL A | HER2      | NA       | -3.126530612 | 0.0018    | -5.702727273 | 0.7107    | 0.079641536  |
|         | LUMINAL A | NORMAL    | 0.0189   | 1.367857143  | NaN       | NaN          | 0.3228    | -0.26177778  |
|         | LUMINAL A | CLAUDIN   | 0.7233   | 1.418518519  | 0.5513    | 1.367560497  | NaN       | NaN          |
|         | LUMINAL B | BASAL     | 0.3684   | 2.31016731   | 0.6229    | 0.636702128  | 0.0014    | -0.929500203 |
|         | LUMINAL B | HER2      | 0.0816   | -5.233236152 | 0.157     | -5.985       | 0.0185    | -0.430267455 |
|         | LUMINAL B | NORMAL    | NA       | 2.289540816  | NaN       | NaN          | 0.0031    | -0.771686771 |
|         | LUMINAL B | CLAUDIN   | 0.4193   | 2.374338624  | 0.5545    | 1.435251799  | NaN       | NaN          |
|         | BASAL     | HER2      | 0.0141   | -2.265306122 | 0.1587    | -9.4         | 0.0667    | 0.499232748  |
|         | BASAL     | NORMAL    | NA       | 0.991071429  | NaN       | NaN          | 0.6029    | 0.157813432  |
|         | BASAL     | CLAUDIN   | 0.9797   | 1.027777778  | 0.4559    | 2.254196643  | NaN       | NaN          |
|         | HER2      | NORMAL    | NA       | -0.4375      | NaN       | NaN          | 0.161     | -0.341419316 |
|         | HER2      | CLAUDIN   | 0.3114   | -0.453703704 | 0.0672    | -0.239808153 | NaN       | NaN          |
|         | NORMAL    | CLAUDIN   | NA       | 1.037037037  | NaN       | NaN          | NaN       | NaN          |
| LYPD1   | LUMINAL A | LUMINAL B | 0.9953   | 1.004270463  | 0.781     | 0.852690947  | 0.9309    | 0.016257026  |
|         | LUMINAL A | BASAL     | 0.8049   | 0.837388724  | 0.8471    | 0.81553043   | 3.00E-04  | -1.369349923 |
|         | LUMINAL A | HER2      | 0.7127   | 0.724053881  | 0.3244    | 2.593525877  | 0.0103    | -0.529117743 |
|         | LUMINAL A | NORMAL    | NA       | 1.029927007  | NaN       | NaN          | 0.0171    | -0.590920017 |
|         | LUMINAL A | CLAUDIN   | 0.6722   | 0.553333333  | 0.7757    | 1.220329708  | NaN       | NaN          |
|         | LUMINAL B | BASAL     | 0.82     | 0.833827893  | 0.9643    | 0.956419712  | 4.00E-04  | -1.385606949 |
|         | LUMINAL B | HER2      | 0.7247   | 0.720974984  | 0.2948    | 3.041577825  | 0.0229    | -0.54537477  |
|         | LUMINAL B | NORMAL    | NA       | 1.025547445  | NaN       | NaN          | 0.0259    | -0.607177043 |
|         | LUMINAL B | CLAUDIN   | 0.6717   | 0.550980392  | 0.6183    | 1.431151242  | NaN       | NaN          |
|         | BASAL     | HER2      | 0.8688   | 0.864656831  | 0.4894    | 3.180170576  | 0.0194    | 0.84023218   |
|         | BASAL     | NORMAL    | NA       | 1.229927007  | NaN       | NaN          | 0.0374    | 0.778429906  |
|         | BASAL     | CLAUDIN   | 0.7456   | 0.660784314  | 0.738     | 1.49636318   | NaN       | NaN          |
|         | HER2      | NORMAL    | NA       | 1.422445255  | NaN       | NaN          | 0.8151    | -0.061802273 |
|         | HER2      | CLAUDIN   | 0.8252   | 0.764215686  | 0.5319    | 0.47052922   | NaN       | NaN          |
|         | NORMAL    | CLAUDIN   | NA       | 0.537254902  | NaN       | NaN          | NaN       | NaN          |
| SLITRK2 | LUMINAL A | LUMINAL B | 0.9298   | 1.029799764  | 0.4987    | 0.778367618  | 0.9129    | -0.006052785 |
|         | LUMINAL A | BASAL     | 0.652    | 1.307283035  | 0.7963    | 0.75718128   | 0.302     | 0.054871901  |
|         | LUMINAL A | HER2      | 0.5422   | 1.345421903  | 0.3365    | 0.578497452  | 0.884     | 0.010133192  |
|         | LUMINAL A | NORMAL    | NA       | 1.026575342  | NaN       | NaN          | 0.7313    | -0.022815678 |
|         | LUMINAL A | CLAUDIN   | 0.1023   | 8.058064516  | 0.5926    | 1.417094533  | NaN       | NaN          |
|         | LUMINAL B | BASAL     | 0.701    | 1.269453617  | 0.9757    | 0.972781065  | 0.2116    | 0.060924686  |
|         | LUMINAL B | HER2      | 0.6037   | 1.306488843  | 0.5019    | 0.743218807  | 0.8059    | 0.016185977  |
|         | LUMINAL B | NORMAL    | NA       | 0.996868885  | NaN       | NaN          | 0.7892    | -0.016762893 |
|         | LUMINAL B | CLAUDIN   | 0.1038   | 7.824884793  | 0.1977    | 1.820598007  | NaN       | NaN          |
|         | BASAL     | HER2      | 0.9704   | 1.029174147  | 0.7535    | 0.764014467  | 0.4854    | -0.044738709 |
|         | BASAL     | NORMAL    | NA       | 0.785273973  | NaN       | NaN          | 0.2084    | -0.077687579 |
|         | BASAL     | CLAUDIN   | 0.27     | 6.163978495  | 0.6196    | 1.871539313  | NaN       | NaN          |
|         | HER2      | NORMAL    | NA       | 0.763013699  | NaN       | NaN          | 0.662     | -0.03294887  |
|         | HER2      | CLAUDIN   | 0.2322   | 5.989247312  | 0.198     | 2.449612403  | NaN       | NaN          |
|         | NORMAL    | CLAUDIN   | NA       | 7.849462366  | NaN       | NaN          | NaN       | NaN          |

**Figure S2:** Statistical comparisons between different subtypes for the expression of  
LYPD1, TMEM47, and SLITRK2.

**A**

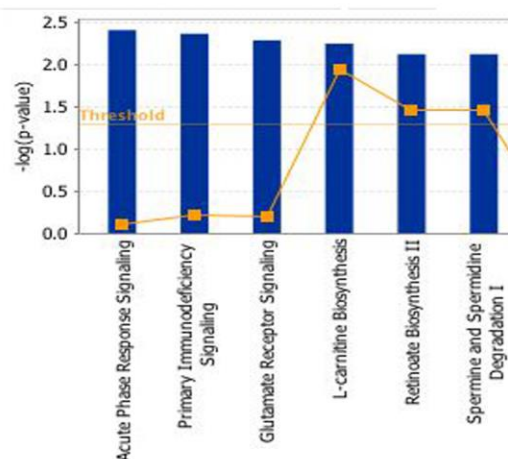

**Lung metastasis genes**

**B**

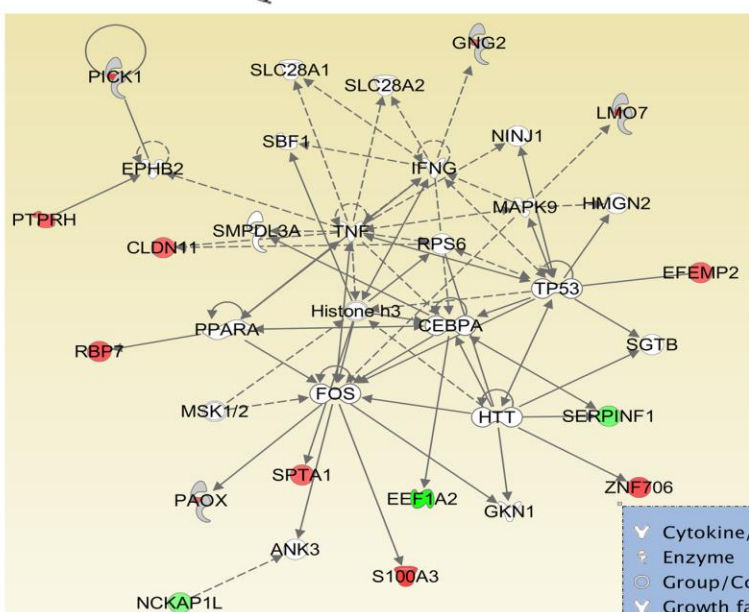

**C**

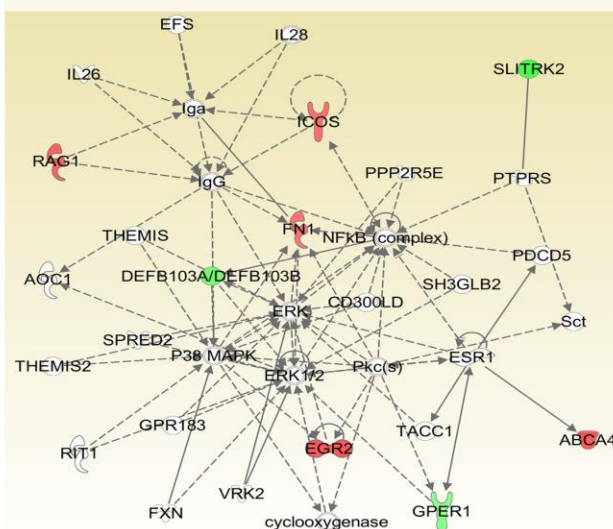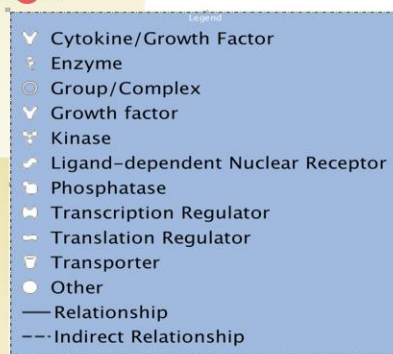

**Figure S3:** Ingenuity pathway analysis of genes differentially expressed in LMD-231 cells. A) Major signaling pathways in LMD-231 cells. B) LMD-231 cells show activation of TNF-CEBPA-p53 network. C) ERK-AKT-NF- $\kappa$ B signaling network is active in LMD-231 cells.

A

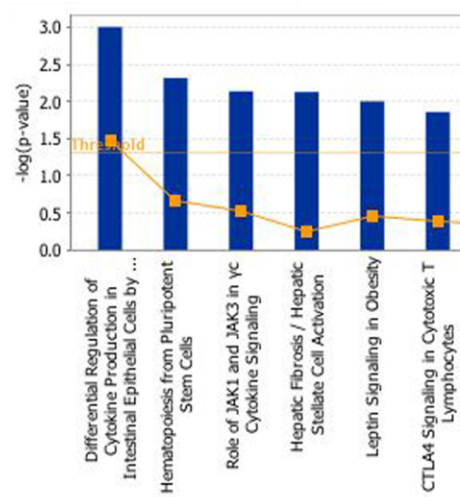

Bone metastasis genes

B

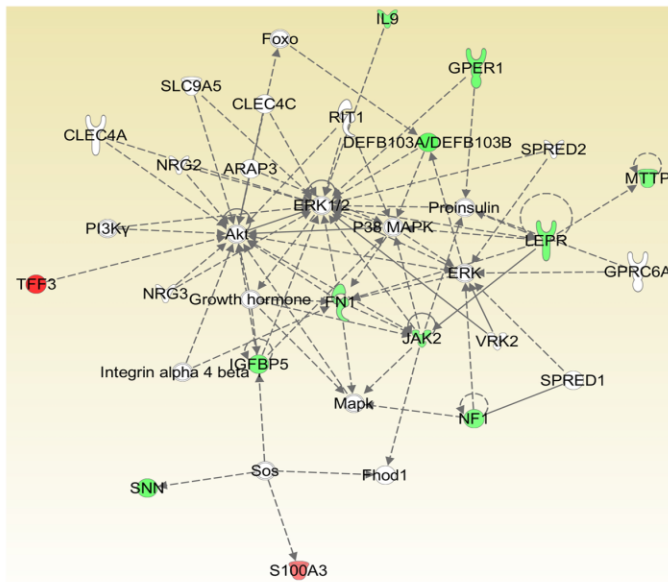

AKT-ERK-growth hormone network

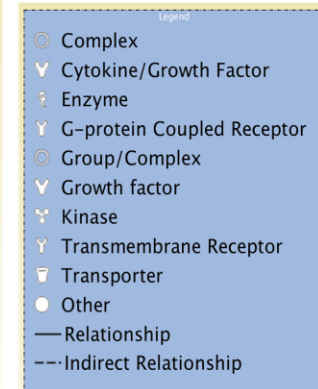

C

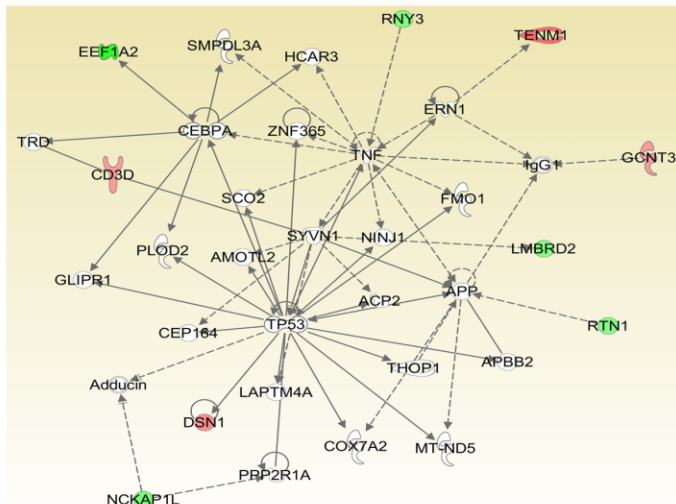

TNF-p53 network

**Figure S4:** Ingenuity pathway analysis of genes differentially expressed in BMD-231 cells. A) Major signaling pathways in BMD-231 cells. B) BMD-231 cells show activation of AKT-ERK-Growth hormone network. C) TNF-p53 signaling network is active in BMD-231 cells.

**Table S1:** PAM classifier analysis of microarray results to identify organ-specific metastasis signature.

**Table S2:** Various comparisons of genes differentially expressed in different cell types. ANOVA analysis was performed to measure genes differentially expressed in different cell types.

**Note:** Tables S1 and S2 are in supplementary Information in oncotarget site.

**Table S3:** Sequences of primers used for qRT-PCR

| Gene           | Forward                  | Reverse                  |
|----------------|--------------------------|--------------------------|
| $\beta$ -Actin | TGGATCAGCAAGCAG          | GCATTTGCGGTGGAC          |
| CXCL1          | CCAGACCCGCCTGCTG         | CCTCCTCCCTTCTGGTCAGTT    |
| ESM1           | TAATTATGCGGTGGACTGCCCTCA | TTCATGCCATCCATGCCTGAGACT |
| LYPD1          | TTGCGGATTGTTCTTGCTTCCAGG | TGATGATGCACAGGACTTGCGGTA |
| SGK1           | AGGCATGTAGCAGGGAGGCTTATT | TTTCATTCTTCGGGTGCCCCAAGG |
| SLITRK2        | TCGGTTACTAATGACTTGGCGGCT | TTAGGCACCTTCGGTGTCAACTCA |
| TMEM47         | TTACCGCCTGCTTATCCTACCCAA | TCCCATTAGATGCTGAAGGGCAGT |
